# Supplementary material for: Genetic counselling and testing in pulmonary arterial hypertension: a consensus statement on behalf of the International Consortium for Genetic Studies in PAH
Source: PubMed Central journal article supplement — Eur Respir J. 2023 Feb 23;61(2):2201471. doi: 10.1183/13993003.01471-2022 (PMC9947314; doi:10.1183/13993003.01471-2022), 2023-02-23

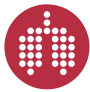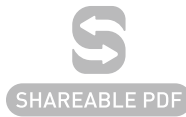

# Genetic counselling and testing in pulmonary arterial hypertension: a consensus statement on behalf of the International Consortium for Genetic Studies in PAH

Christina A. Eichstaedt<sup>1,2,3</sup>, Catharina Belge<sup>4</sup>, Wendy K. Chung <sup>5,6</sup>, Stefan Gräf <sup>7,8,9</sup>, Ekkehard Grünig<sup>1,2</sup>, David Montani <sup>10,11</sup>, Rozenn Quarck <sup>4</sup>, Jair A. Tenorio-Castano<sup>12,13,14</sup>, Florent Soubrier <sup>15</sup>, Richard C. Trembath<sup>16</sup> and Nicholas W. Morrell<sup>7,8</sup> for PAH-ICON associated with the PVRI<sup>17</sup>

<sup>1</sup>Center for Pulmonary Hypertension, Thoraxklinik Heidelberg gGmbH at Heidelberg University Hospital, Heidelberg, Germany. <sup>2</sup>Translational Lung Research Center Heidelberg (TLRC), German Center for Lung Research (DZL), Heidelberg, Germany. <sup>3</sup>Laboratory for Molecular Genetic Diagnostics, Institute of Human Genetics, Heidelberg University, Heidelberg, Germany. <sup>4</sup>Laboratory of Respiratory Diseases and Thoracic Surgery (BREATHE), Department of Chronic Diseases and Metabolism (CHROMETA), Clinical Department of Respiratory Diseases, University Hospitals, University of Leuven, Leuven, Belgium. <sup>5</sup>Department of Pediatrics, Columbia University Irving Medical Center, New York, NY, USA. <sup>6</sup>Department of Medicine, Columbia University Irving Medical Center, New York, NY, USA. <sup>7</sup>Department of Medicine, Heart and Lung Research Institute, University of Cambridge, Cambridge, UK. <sup>8</sup>Department of Haematology, University of Cambridge, Cambridge, UK. <sup>9</sup>NIHR BioResource for Translational Research – Rare Diseases, University of Cambridge, Cambridge, UK. <sup>10</sup>Université Paris-Saclay, AP-HP, French Referral Center for Pulmonary Hypertension, Pulmonary Department, Hôpital de Bicêtre, Le Kremlin-Bicêtre, France. <sup>11</sup>INSERM UMR\_S999, Hôpital Marie Lannelongue, Le Plessis-Robinson, France. <sup>12</sup>INGEMM, Instituto de Genética Médica y Molecular, IdiPAZ, Hospital Universitario La Paz, Madrid, Spain. <sup>13</sup>CIBERER (Centro de Investigación Biomédica en Red de Enfermedades Raras), Madrid, Spain. <sup>14</sup>ITHACA, European Reference Network, Brussels, Belgium. <sup>15</sup>Sorbonne Université, AP-HP, Département de Génétique, INSERM UMR\_S1166, Sorbonne Université, Institute for Cardiometabolism and Nutrition (ICAN), Hôpital Pitié-Salpêtrière, Paris, France. <sup>16</sup>Department of Medical and Molecular Genetics, Faculty of Life Sciences and Medicine, King's College London, London, UK. <sup>17</sup>A list of PAH-ICON members is available at the end of this statement.

Corresponding author: Nicholas W. Morrell ([nwm23@cam.ac.uk](mailto:nwm23@cam.ac.uk))

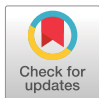

Shareable abstract (@ERSpublications)

**Idiopathic, anorexigen-induced, congenital heart disease-associated and heritable PAH, and pulmonary veno-occlusive disease patients should be offered genetic counselling and testing with a gene panel including all disease genes for the condition** <https://bit.ly/3ga3HEc>

**Cite this article as:** Eichstaedt CA, Belge C, Chung WK, *et al.* Genetic counselling and testing in pulmonary arterial hypertension: a consensus statement on behalf of the International Consortium for Genetic Studies in PAH. *Eur Respir J* 2023; 61: 2201471 [DOI: 10.1183/13993003.01471-2022].

This single-page version can be shared freely online.

Copyright ©The authors 2023.

This version is distributed under the terms of the Creative Commons Attribution Non-Commercial Licence 4.0. For commercial reproduction rights and permissions contact [permissions@ersnet.org](mailto:permissions@ersnet.org)

Received: 22 July 2022  
Accepted: 7 Oct 2022

## Abstract

Pulmonary arterial hypertension (PAH) is a rare disease that can be caused by (likely) pathogenic germline genomic variants. In addition to the most prevalent disease gene, *BMPR2* (bone morphogenetic protein receptor 2), several genes, some belonging to distinct functional classes, are also now known to predispose to the development of PAH. As a consequence, specialist and non-specialist clinicians and healthcare professionals are increasingly faced with a range of questions regarding the need for, approaches to and benefits/risks of genetic testing for PAH patients and/or related family members. We provide a consensus-based approach to recommendations for genetic counselling and assessment of current best practice for disease gene testing. We provide a framework and the type of information to be provided to patients and relatives through the process of genetic counselling, and describe the presently known disease causal genes to be analysed. Benefits of including molecular genetic testing within the management protocol of patients with PAH include the identification of individuals misclassified by other diagnostic approaches, the optimisation of phenotypic characterisation for aggregation of outcome data, including in clinical trials, and importantly through cascade screening, the detection of healthy causal variant carriers, to whom regular assessment should be offered.

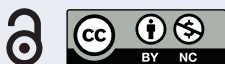

Supplement: ERJ-01471-2022.Shareable.pdf [file ERJ-01471-2022.Shareable.pdf]
